# Supplementary material for: Mutational Profiling of Lung Cancer Using Next Generation Sequencing: A Malaysian Real-World Clinical Diagnostic Experience
Source: MDPI journal article supplement (doi:10.3390/jmp4010004), 2023-01-11
Supplement: s1 [file s1]

**Supplementary Table S1.** Lung cancer samples for NGS testing were referred from medical centres and institutions in Malaysia

| Locations of referral medical centres and institutions | Samples , N (%) |
|--------------------------------------------------------|-----------------|
| Klang Valley                                           | 304 (64.8%)     |
| Penang                                                 | 71 (15.1%)      |
| Johor                                                  | 49 (10.4%)      |
| Malacca                                                | 17 (3.6%)       |
| Pahang                                                 | 5 (1.1%)        |
| Kedah                                                  | 1 (0.2%)        |
| Kelantan                                               | 1 (0.2%)        |
| East Malaysia (Sabah/Sarawak)                          | 21 (4.5%)       |

**Supplementary Table S2.** Lung cancer patients smoking habits distributed by sex in Nexus 1 and Nexus 2-3. P-values were obtained using a Chi-square test.

| Characteristics        | Cohort                     |           |                 |                              |           |                 |
|------------------------|----------------------------|-----------|-----------------|------------------------------|-----------|-----------------|
|                        | Nexus 1 (n = 112)<br>n (%) |           |                 | Nexus 2-3 (n = 201)<br>n (%) |           |                 |
|                        | Male                       | Female    | <i>p</i> -value | Male                         | Female    | <i>p</i> -value |
| Non-smoker             | 15 (20.3)                  | 59 (79.7) | <0.001          | 62 (47.0)                    | 70 (53.0) | 0.002           |
| Smoker + Former smoker | 32 (84.2)                  | 6 (15.8)  |                 | 49 (71.0)                    | 20 (29.0) |                 |

**Supplementary Table S3.** *EGFR* mutation profile in Nexus1 and Nexus 2-3 cohorts, including the subset of patients that received second-line therapy.

| Exons   | Genetic alterations* | Cohort                           |                               |                                  |                                |
|---------|----------------------|----------------------------------|-------------------------------|----------------------------------|--------------------------------|
|         |                      | Nexus 1                          |                               | Nexus 2-3                        |                                |
|         |                      | All patients<br>n = 156<br>n (%) | Second-line<br>n = 6<br>n (%) | All patients<br>n = 313<br>n (%) | Second-line<br>n = 33<br>n (%) |
| Exon 15 | p.G598V              |                                  |                               | 1 (0.3)                          | 1 (3.0)                        |
| Exon 18 | p.E709A              |                                  |                               | 2 (0.6)                          |                                |
|         | p.E709K              |                                  |                               | 2 (0.6)                          |                                |
|         | p.E709V              |                                  |                               | 1 (0.3)                          |                                |
|         | p.G719S              |                                  |                               | 2 (0.6)                          |                                |
|         | p.G719A              | 1 (0.6)                          |                               | 6 (1.9)                          |                                |
|         | p.G719C              | 1 (0.6)                          |                               |                                  |                                |
|         | p.G724S              |                                  |                               | 1 (0.3)                          |                                |
| Exon 19 | p.L747P              |                                  |                               | 1 (0.3)                          | 1 (3.0)                        |
|         | p.L747S              |                                  |                               | 2 (0.6)                          |                                |
|         | p.A750P              |                                  |                               | 3 (1.0)                          | 1 (3.0)                        |
|         | p.K757R              |                                  |                               | 1 (0.3)                          |                                |
|         | Exon 19 deletion(s)  | 28 (17.9)                        | 4 (66.7)                      | 66 (21.1)                        | 12 (36.4)                      |
| Exon 20 | p.R776H              | 1 (0.6)                          |                               |                                  |                                |
|         | p.S768I              |                                  |                               | 4 (1.3)                          |                                |
|         | p.T790M              |                                  | 3 (50.0)                      | 4 (1.3)                          | 4 (12.1)                       |
|         | p.C797S              |                                  |                               | 5 (1.6)                          | 5 (15.2)                       |
|         | Exon 20 insertion(s) | 5 (3.2)                          |                               | 3 (1.0)                          |                                |
| Exon 21 | p.L833V              |                                  |                               | 2 (0.6)                          |                                |
|         | p.L858R              | 33 (21.2)                        | 2 (33.3)                      | 51 (16.3)                        | 12 (36.4)                      |
|         | p.K860I              | 1 (0.6)                          |                               |                                  |                                |
|         | p.L861Q              | 2 (1.3)                          |                               | 2 (0.6)                          |                                |
|         | p.A871X              | 1 (0.6)                          |                               |                                  |                                |

\*Genetic alterations are listed from top to bottom of table according to *EGFR* forward strand 5' to 3'

**Supplementary Table S4.** *RET* and *MET* mutation profile in Nexus 1 and Nexus 2-3 cohorts.

| Genetic alterations | Cohort                     |            |                              |            |
|---------------------|----------------------------|------------|------------------------------|------------|
|                     | Nexus 1 (n = 156)<br>n (%) |            | Nexus 2-3 (n = 313)<br>n (%) |            |
|                     | <i>RET</i>                 | <i>MET</i> | <i>RET</i>                   | <i>MET</i> |
| SNV                 | –                          | –          | –                            | 2 (0.6)    |
| Fusion              | 1 (0.6)                    | –          | 2 (0.6)                      | –          |
| Amplification       | –                          | –          | –                            | 17 (5.4)   |
| Exon 14 skipping    | –                          | 3 (1.9)    | –                            | 12 (3.8)   |
| Frameshift          | –                          | –          | –                            | 1 (0.3)    |

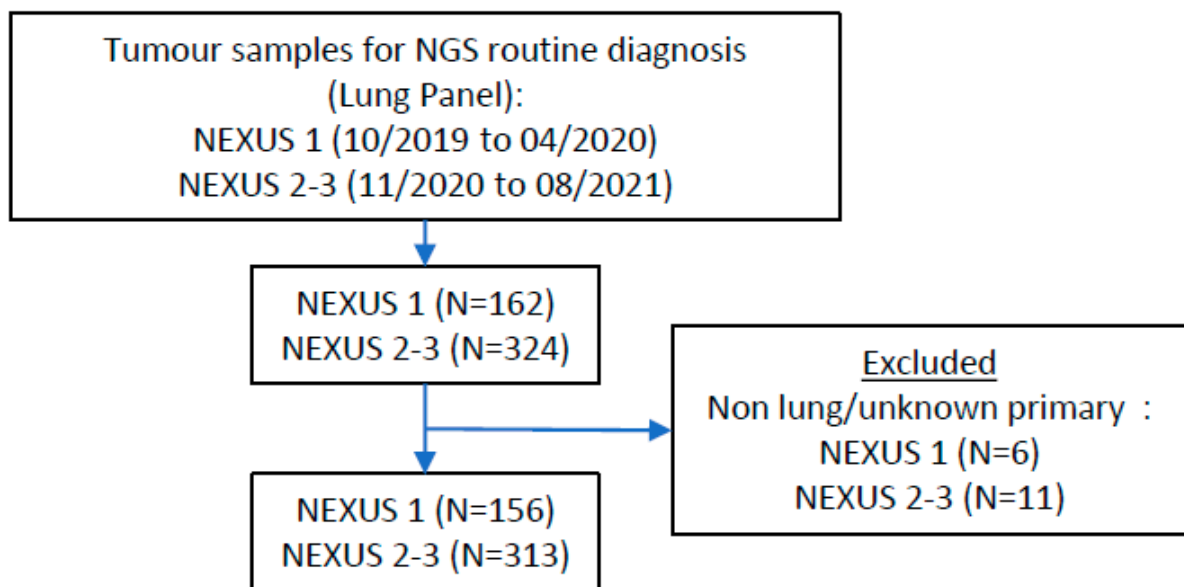

**Supplementary Figure S1.** STARD Flow diagram depicting samples included in analysis.

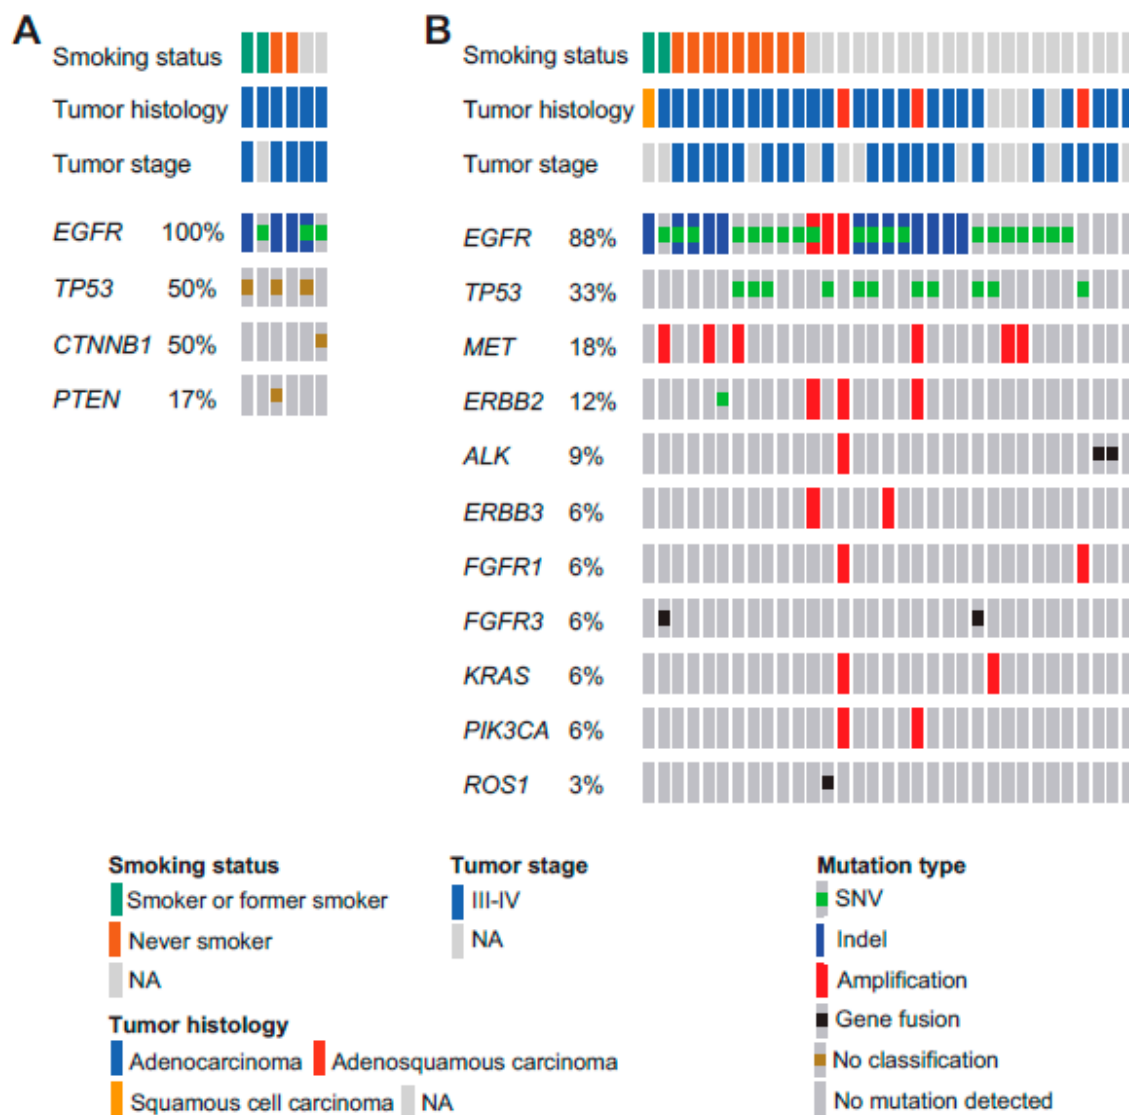

**Supplementary Figure S2.** Mutation profiles of lung cancer patients that received second-line therapy in the Nexus 1 (A) and Nexus 2-3 (B) cohorts. Each column represents a patient and each row represents a gene. Patients were clustered according to smoking status; also represented are tumor histology and stage (color-coded in categories I-II and III-IV for improved visualization). The mutated genes are listed on the left side of the diagram, in descending order of frequency, and within the same frequency, in alphabetical order. The color code represents the mutation type, smoking status, tumor histology and tumor stage indicated in the figure legend. NA: not available.

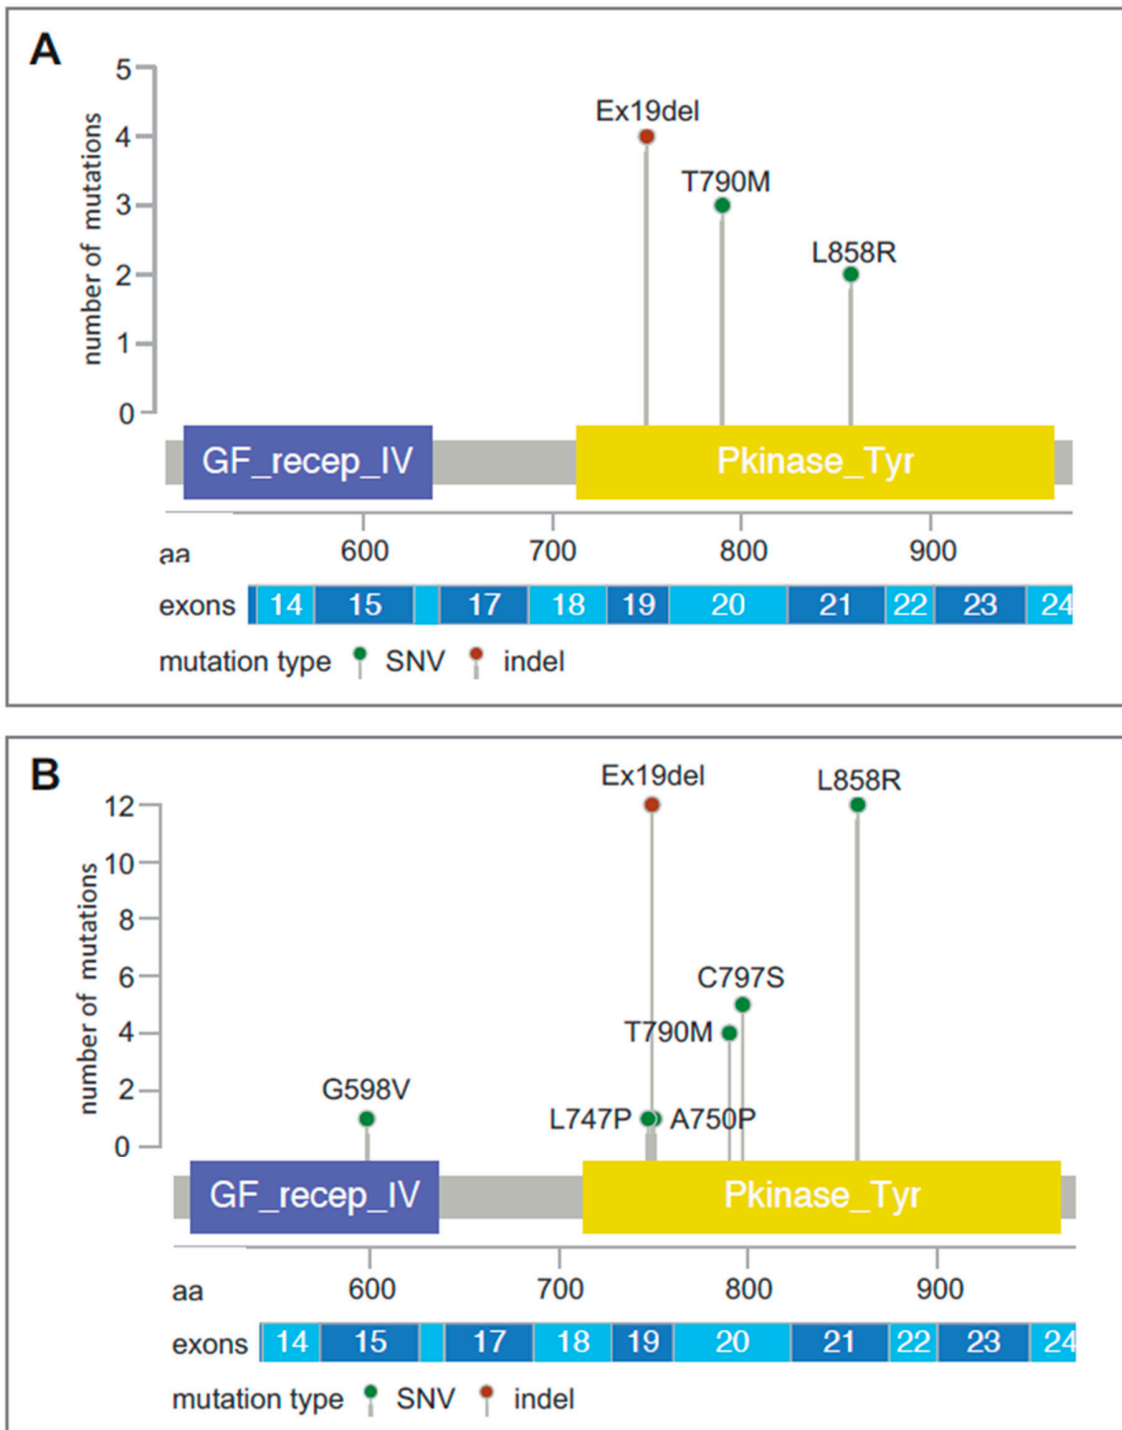

**Supplementary Figure S3.** *EGFR* mutation profile in the subset of patients that received second-line therapy in the Nexus 1 (A) and Nexus 2-3 (B) cohorts. Diagrams represent the *EGFR* domains where mutations were detected. Ex19del: exon 19 deletion, Ex20ins: exon 20 insertion, GF\_recep\_IV: growth factor receptor domain IV, Pkinase\_Tyr: protein tyrosine kinase, aa: amino acid, SNV: single nucleotide variant, indel: nucleotide(s) insertion or deletion.
